# Supplementary material
Source: Springer Nature journal article supplement (https://www.springermedizin.de/resource/supplementary/12970_2007_47_MOESM9_ESM.pdf/9594242)
Supplement: MOESM9 [file 9594242]

| Ancillary Drug                                                                                                                       | Prevalence       | Mean Rating | Reason for Use                                                                                                                                                   |
|--------------------------------------------------------------------------------------------------------------------------------------|------------------|-------------|------------------------------------------------------------------------------------------------------------------------------------------------------------------|
| Accutane                                                                                                                             | 7.7% (n = 151)   | 2.7         | Prevent or treat acne                                                                                                                                            |
| Antidepressants                                                                                                                      | 9.3% (n = 182)   | 2.1         | Mood elevation                                                                                                                                                   |
| Arimidex (anastrozole)                                                                                                               | 41.1% (n = 804)  | 2.6         | Prevent estrogen side effects via halting the conversion of excess androgens into estrogen                                                                       |
| Aromasin (exemestane)                                                                                                                | 8.1% (n = 160)   | 2.7         | Prevent estrogen side effects via halting the conversion of excess androgens into estrogen                                                                       |
| Antianxiety medications                                                                                                              | 11.2% (n = 219)  | 2.3         | Reduce anxiety                                                                                                                                                   |
| Blood pressure medications                                                                                                           | 9.7% (n = 190)   | 2.4         | Reduce blood pressure                                                                                                                                            |
| Clomid (clomiphene citrate)                                                                                                          | 61.9% (n = 1210) | 2.4         | Estrogen antagonist used to prevent estrogen related side effects / stimulate FSH to elevate reduced testosterone levels during a cycle                          |
| Femara (letrozole)                                                                                                                   | 14.4% (n = 281)  | 2.7         | Prevent estrogen side effects via halting the conversion of excess androgens into estrogen / stimulate FSH to elevate reduced testosterone levels during a cycle |
| Proscar, Propecia (finasteride)                                                                                                      | 10.8% (n = 211)  | 2.1         | Alpha reductase inhibitor which blocks the conversion of testosterone into DHT / used to prevent balding                                                         |
| Human Chorionic Gonadotropin (HCG)                                                                                                   | 43% (n = 840)    | 2.6         | Reverse or prevent testicular atrophy by acting like LH and stimulating Leydig cells                                                                             |
| Nolvadex (tamoxifen citrate)                                                                                                         | 65.3% (n = 1277) | 2.6         | Estrogen antagonist used to prevent estrogen related side effects (e.g., gynocomastia) / stimulate FSH to elevate reduced testosterone levels during a cycle     |
| Sleeping medications                                                                                                                 | 22.7% (n = 444)  | 2.6         | Sleep aid                                                                                                                                                        |
| Viagra (sildenafil citrate); Cialis (tadalafil)                                                                                      | 27.5% (n = 538)  | 2.6         | Treatment of erectile dysfunction                                                                                                                                |
| * Rating scale = 1 (not effective), 2 (moderately effective), 3 (highly effective) or a box indicating they had never used the agent |                  |             |                                                                                                                                                                  |
